# Supplementary material for: An integrative framework for the identification of double minute chromosomes using next generation sequencing data
Source: PubMed Central journal article supplement (PMC4423570; doi:10.1186/1471-2156-16-s2-s1), 2015-04-23
Supplement: 1471-2156-16-S2-S1-S1.pdf [file 1471-2156-16-S2-S1-S1.pdf]

# An Integrative Framework for the Identification of Double Minute Chromosomes Using Next Generation Sequencing Data

## Simulated Data Creation

### *WGSim Non-Default Settings*

- -h: N
- -d: 400
- -s: 50
- -1: 100
- -2: 100
- -N: 139385615
  - This number was used to give us an average coverage of 35 reads per base.

### *Selected Breakpoint and Amplicon Coordinates*

The coordinates chosen to comprise each DM are listed in the Appendix. Each grouping of coordinates is one double minute, and each row is an amplicon (with the exception of the two chr14 rows, which together form a single amplicon). The rearrangement breakpoints are formed by the fusing of consecutive amplicons. For each row, we put a “+” if the segment lies on the 5’-3’ strand (with respect to the p-arm telomere), and a “-“ if the segment is on the 3’-5’ strand. For each double minute, the two chr14 entries denote the same amplicon; this was done to facilitate sequence extraction using the FastaFromBed tool in the BEDTools suite [1].

After each sequence corresponding to each row was extracted, it was copied {1,2,5} times and appended to the {1,2,5}.fa FASTA files. Each of these three FASTA files also contained a full copy of chromosomes 1,2,3 and 14. After the creation of these FASTA files, we simulated the creation of FASTQ sequence reads using WGSim, per the parameters described above. Once the FASTQ files were created, they were aligned to hg19 chromosomes 1,2,3, and 14 as described in the “Programs and Settings.docx” supplement.

## APPENDIX

### Coordinates Chosen for Simulated Double Minutes

| <b>DM 1</b> |          |          |   |
|-------------|----------|----------|---|
| chr14       | 20050000 | 20100000 | + |
| chr2        | 9000000  | 9100000  | + |
| chr3        | 9000000  | 9100000  | - |
| chr1        | 13000000 | 13100000 | - |
| chr2        | 13000000 | 13100000 | - |
| chr1        | 9000000  | 9100000  | + |
| chr3        | 13000000 | 13100000 | - |
| chr1        | 5000000  | 5100000  | - |
| chr2        | 5000000  | 5100000  | - |
| chr3        | 5000000  | 5100000  | - |
| chr14       | 20000000 | 20049999 | + |
| <b>DM 2</b> |          |          |   |
| chr14       | 20250000 | 20300000 | + |
| chr2        | 9200000  | 9300000  | + |
| chr3        | 9200000  | 9300000  | - |
| chr1        | 9200000  | 9300000  | - |
| chr1        | 5200000  | 5300000  | + |
| chr2        | 13200000 | 13300000 | + |
| chr2        | 5200000  | 5300000  | - |
| chr3        | 13200000 | 13300000 | - |
| chr3        | 5200000  | 5300000  | - |
| chr1        | 13200000 | 13300000 | - |
| chr14       | 20200000 | 20249999 | + |
| <b>DM 3</b> |          |          |   |
| chr14       | 20450000 | 20500000 | + |
| chr3        | 9400000  | 9500000  | + |
| chr3        | 5400000  | 5500000  | - |
| chr1        | 9400000  | 9500000  | + |
| chr2        | 9400000  | 9500000  | + |
| chr3        | 13400000 | 13500000 | + |
| chr1        | 13400000 | 13500000 | + |
| chr1        | 5400000  | 5500000  | - |
| chr2        | 5400000  | 5500000  | + |
| chr2        | 13400000 | 13500000 | - |
| chr14       | 20400000 | 20449999 | + |
| <b>DM 4</b> |          |          |   |
| chr14       | 20650000 | 20700000 | + |

|             |          |          |   |
|-------------|----------|----------|---|
| chr1        | 9600000  | 9700000  | + |
| chr2        | 5600000  | 5700000  | - |
| chr1        | 5600000  | 5700000  | + |
| chr3        | 13600000 | 13700000 | - |
| chr1        | 13600000 | 13700000 | + |
| chr3        | 5600000  | 5700000  | + |
| chr2        | 9600000  | 9700000  | - |
| chr3        | 9600000  | 9700000  | + |
| chr2        | 13600000 | 13700000 | - |
| chr14       | 20600000 | 20649999 | + |
| <b>DM 5</b> |          |          |   |
| chr14       | 20850000 | 20900000 | + |
| chr1        | 5800000  | 5900000  | - |
| chr1        | 9800000  | 9900000  | - |
| chr2        | 13800000 | 13900000 | + |
| chr3        | 9800000  | 9900000  | - |
| chr3        | 13800000 | 13900000 | + |
| chr2        | 5800000  | 5900000  | - |
| chr2        | 9800000  | 9900000  | + |
| chr3        | 5800000  | 5900000  | + |
| chr1        | 13800000 | 13900000 | - |
| chr14       | 20800000 | 20849999 | + |
| <b>DM 6</b> |          |          |   |
| chr14       | 21050000 | 21100000 | + |
| chr3        | 6000000  | 6100000  | - |
| chr3        | 10000000 | 10100000 | - |
| chr1        | 10000000 | 10100000 | + |
| chr2        | 10000000 | 10100000 | - |
| chr2        | 6000000  | 6100000  | - |
| chr2        | 14000000 | 14100000 | + |
| chr1        | 6000000  | 6100000  | + |
| chr1        | 14000000 | 14100000 | - |
| chr3        | 14000000 | 14100000 | + |
| chr14       | 21000000 | 21049999 | + |
| <b>DM 7</b> |          |          |   |
| chr14       | 21250000 | 21300000 | + |
| chr3        | 10200000 | 10300000 | + |
| chr1        | 6200000  | 6300000  | - |
| chr3        | 6200000  | 6300000  | + |
| chr2        | 14200000 | 14300000 | + |
| chr3        | 14200000 | 14300000 | + |

|              |          |          |   |
|--------------|----------|----------|---|
| chr2         | 6200000  | 6300000  | - |
| chr2         | 10200000 | 10300000 | + |
| chr1         | 10200000 | 10300000 | + |
| chr1         | 14200000 | 14300000 | - |
| chr14        | 21200000 | 21249999 | + |
| <b>DM 8</b>  |          |          |   |
| chr14        | 21450000 | 21500000 | + |
| chr1         | 14400000 | 14500000 | - |
| chr1         | 6400000  | 6500000  | + |
| chr2         | 6400000  | 6500000  | + |
| chr3         | 14400000 | 14500000 | + |
| chr2         | 14400000 | 14500000 | + |
| chr3         | 6400000  | 6500000  | - |
| chr3         | 10400000 | 10500000 | - |
| chr1         | 10400000 | 10500000 | + |
| chr2         | 10400000 | 10500000 | + |
| chr14        | 21400000 | 21449999 | + |
| <b>DM 9</b>  |          |          |   |
| chr14        | 21650000 | 21700000 | + |
| chr2         | 14600000 | 14700000 | - |
| chr1         | 10600000 | 10700000 | + |
| chr3         | 6600000  | 6700000  | - |
| chr2         | 6600000  | 6700000  | + |
| chr3         | 14600000 | 14700000 | - |
| chr1         | 6600000  | 6700000  | - |
| chr3         | 10600000 | 10700000 | - |
| chr1         | 14600000 | 14700000 | - |
| chr2         | 10600000 | 10700000 | - |
| chr14        | 21600000 | 21649999 | + |
| <b>DM 10</b> |          |          |   |
| chr14        | 21850000 | 21900000 | + |
| chr2         | 10800000 | 10900000 | - |
| chr3         | 10800000 | 10900000 | - |
| chr2         | 14800000 | 14900000 | + |
| chr3         | 14800000 | 14900000 | + |
| chr1         | 14800000 | 14900000 | + |
| chr1         | 6800000  | 6900000  | + |
| chr3         | 6800000  | 6900000  | - |
| chr2         | 6800000  | 6900000  | + |
| chr1         | 10800000 | 10900000 | + |
| chr14        | 21800000 | 21849999 | + |

| <b>DM 11</b> |          |          |   |
|--------------|----------|----------|---|
| chr14        | 22050000 | 22100000 | + |
| chr3         | 11000000 | 11100000 | + |
| chr2         | 11000000 | 11100000 | - |
| chr3         | 7000000  | 7100000  | + |
| chr2         | 7000000  | 7100000  | + |
| chr1         | 7000000  | 7100000  | + |
| chr1         | 11000000 | 11100000 | + |
| chr2         | 15000000 | 15100000 | + |
| chr1         | 15000000 | 15100000 | + |
| chr3         | 15000000 | 15100000 | - |
| chr14        | 22000000 | 22049999 | + |
| <b>DM 12</b> |          |          |   |
| chr14        | 22250000 | 22300000 | + |
| chr2         | 7200000  | 7300000  | - |
| chr2         | 11200000 | 11300000 | - |
| chr1         | 11200000 | 11300000 | - |
| chr1         | 15200000 | 15300000 | - |
| chr1         | 7200000  | 7300000  | + |
| chr2         | 15200000 | 15300000 | + |
| chr3         | 11200000 | 11300000 | + |
| chr3         | 7200000  | 7300000  | + |
| chr3         | 15200000 | 15300000 | - |
| chr14        | 22200000 | 22249999 | + |
| <b>DM 13</b> |          |          |   |
| chr14        | 22450000 | 22500000 | + |
| chr1         | 7400000  | 7500000  | + |
| chr2         | 15400000 | 15500000 | + |
| chr1         | 15400000 | 15500000 | + |
| chr2         | 11400000 | 11500000 | + |
| chr3         | 11400000 | 11500000 | + |
| chr3         | 7400000  | 7500000  | + |
| chr1         | 11400000 | 11500000 | + |
| chr3         | 15400000 | 15500000 | - |
| chr2         | 7400000  | 7500000  | + |
| chr14        | 22400000 | 22449999 | + |
| <b>DM 14</b> |          |          |   |
| chr14        | 22650000 | 22700000 | + |
| chr3         | 11600000 | 11700000 | - |
| chr2         | 7600000  | 7700000  | - |
| chr1         | 11600000 | 11700000 | - |

|              |          |          |   |
|--------------|----------|----------|---|
| chr2         | 11600000 | 11700000 | + |
| chr1         | 15600000 | 15700000 | - |
| chr2         | 15600000 | 15700000 | - |
| chr3         | 7600000  | 7700000  | + |
| chr3         | 15600000 | 15700000 | + |
| chr1         | 7600000  | 7700000  | - |
| chr14        | 22600000 | 22649999 | + |
| <b>DM 15</b> |          |          |   |
| chr14        | 22850000 | 22900000 | + |
| chr1         | 15800000 | 15900000 | + |
| chr2         | 11800000 | 11900000 | - |
| chr3         | 7800000  | 7900000  | + |
| chr3         | 11800000 | 11900000 | + |
| chr2         | 15800000 | 15900000 | - |
| chr1         | 11800000 | 11900000 | - |
| chr3         | 15800000 | 15900000 | + |
| chr2         | 7800000  | 7900000  | - |
| chr1         | 7800000  | 7900000  | - |
| chr14        | 22800000 | 22849999 | + |
| <b>DM 16</b> |          |          |   |
| chr14        | 23050000 | 23100000 | + |
| chr1         | 8000000  | 8100000  | - |
| chr3         | 12000000 | 12100000 | - |
| chr1         | 16000000 | 16100000 | - |
| chr2         | 8000000  | 8100000  | - |
| chr1         | 12000000 | 12100000 | - |
| chr2         | 12000000 | 12100000 | + |
| chr2         | 16000000 | 16100000 | + |
| chr3         | 16000000 | 16100000 | - |
| chr3         | 8000000  | 8100000  | + |
| chr14        | 23000000 | 23049999 | + |
| <b>DM 17</b> |          |          |   |
| chr14        | 23250000 | 23300000 | + |
| chr3         | 12200000 | 12300000 | - |
| chr1         | 12200000 | 12300000 | - |
| chr3         | 8200000  | 8300000  | - |
| chr1         | 8200000  | 8300000  | - |
| chr2         | 16200000 | 16300000 | + |
| chr2         | 12200000 | 12300000 | - |
| chr3         | 16200000 | 16300000 | + |
| chr1         | 16200000 | 16300000 | - |

|              |          |          |   |
|--------------|----------|----------|---|
| chr2         | 8200000  | 8300000  | + |
| chr14        | 23200000 | 23249999 | + |
| <b>DM18</b>  |          |          |   |
| chr14        | 23450000 | 23500000 | + |
| chr2         | 8400000  | 8500000  | + |
| chr2         | 16400000 | 16500000 | - |
| chr3         | 16400000 | 16500000 | - |
| chr3         | 12400000 | 12500000 | - |
| chr2         | 12400000 | 12500000 | + |
| chr1         | 16400000 | 16500000 | - |
| chr1         | 12400000 | 12500000 | - |
| chr1         | 8400000  | 8500000  | + |
| chr3         | 8400000  | 8500000  | + |
| chr14        | 23400000 | 23449999 | + |
| <b>DM 19</b> |          |          |   |
| chr14        | 23650000 | 23700000 | + |
| chr3         | 12600000 | 12700000 | - |
| chr1         | 8600000  | 8700000  | + |
| chr2         | 12600000 | 12700000 | + |
| chr2         | 16600000 | 16700000 | - |
| chr3         | 8600000  | 8700000  | - |
| chr1         | 16600000 | 16700000 | + |
| chr3         | 16600000 | 16700000 | - |
| chr1         | 12600000 | 12700000 | - |
| chr2         | 8600000  | 8700000  | - |
| chr14        | 23600000 | 23649999 | + |
| <b>DM 20</b> |          |          |   |
| chr14        | 23850000 | 23900000 | + |
| chr3         | 12800000 | 12900000 | - |
| chr2         | 16800000 | 16900000 | + |
| chr2         | 8800000  | 8900000  | - |
| chr2         | 12800000 | 12900000 | + |
| chr1         | 16800000 | 16900000 | - |
| chr1         | 12800000 | 12900000 | + |
| chr3         | 8800000  | 8900000  | - |
| chr3         | 16800000 | 16900000 | + |
| chr1         | 8800000  | 8900000  | - |
| chr14        | 23800000 | 23849999 | + |

## REFERENCES

- [1] Quinlan AR and Hall IM, 2010. BEDTools: a flexible suite of utilities for comparing genomic features. *Bioinformatics*. 26, 6, pp. 841–842.
