# Supplementary material for: An integrative framework for the identification of double minute chromosomes using next generation sequencing data
Source: PubMed Central journal article supplement (PMC4423570; doi:10.1186/1471-2156-16-s2-s1), 2015-04-23
Supplement: 1471-2156-16-S2-S1-S2.pdf [file 1471-2156-16-S2-S1-S2.pdf]

# An Integrative Framework for the Identification of Double Minute Chromosomes Using Next Generation Sequencing Data

## Programs and Settings

### *Alignment with Bowtie2 version 2.2.3*

1. The Bowtie2 index files for human reference genome (hg19) chromosomes 1,2,3, and 14 were generated with bowtie2-build. Default parameters were used.
2. For alignment with Bowtie2, default parameters were used except for the following parameters:
  - The "--local" option was set.
  - -X: 600

### *Predicting Amplicons with RDXplorer 2.0*

Other than to specify chromosomes 1,2,3, and 14, all default parameters were used.

### *Merging of Amplicons*

Before sending the copy number predictions to our algorithms, we merged amplicons (predicted copy number gains) that were separated by 10,000 bases or less.

### *Predicting Structural Variant Breakpoints with BreakDancer 1.1*

1. Running the configuration script (bam2cfg.pl)
  - Non-default parameters used
    - q: 30
2. Running the main program (breakdancer\_max)
  - c: 4
  - q: 30
  - r: 4

### *Predicting Structural Variant Breakpoints with Delly 0.6.1*

Delly was configured to discover the following kinds of structural variants:

- Deletions (DEL flag)

- Translocations (TRA flag)
- Duplications (DUP flag)
- Inversions (INV flag)

The following non-default parameters were used:

- -x: human.hg19.excl.tsv
  - This file was provided by the Delly authors. It allows the program to exclude the telomeric and centromeric regions from analysis.
- -q: 30

*Discovering Double Minutes with DMFinder 1.0*

- All default parameters used
